# Supplementary material for: Identification of Somatic Mitochondrial DNA Mutations, Heteroplasmy, and Increased Levels of Catenanes in Tumor Specimens Obtained from Three Endometrial Cancer Patients
Source: MDPI journal article supplement (doi:10.3390/life12040562), 2022-04-09
Supplement: s1 [file s1]

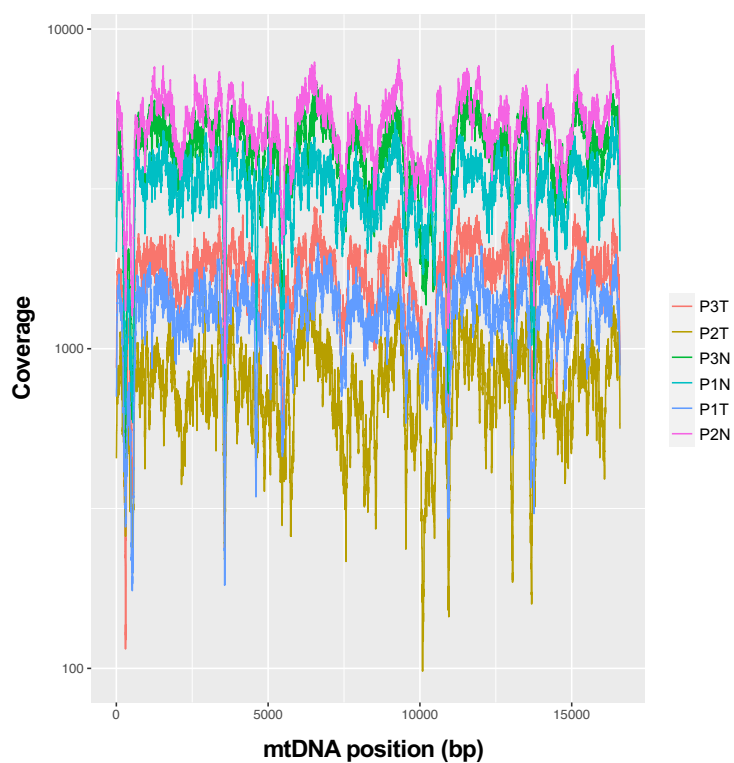

**Supplementary Figure 1.** Mseek deep sequencing read depth (y-axis) versus position on mtDNA (x-axis). Patients 1, 2, and 3 are P1, P2, and P3, respectively; N, perinormal tissue; T, endometrial carcinoma tumor tissue.
